# Supplementary material for: Renal inflammation combined with renal function reserve reduction accelerate kidney aging via pentose phosphate pathway
Source: PubMed Central journal article supplement — iScience. 2024 May 22;27(6):110045. doi: 10.1016/j.isci.2024.110045 (PMC11214290; doi:10.1016/j.isci.2024.110045), 2024-05-22
Supplement: mmc1.pdf [file mmc1.pdf]

**Supplemental information**

**Renal inflammation combined with renal  
function reserve reduction accelerate kidney  
aging via pentose phosphate pathway**

**Bing Han, YiXuan Zhang, Chao Liu, Pengcheng Ji, Zenghui Xing, Xiaodong Geng, Kun  
Chi, Ming Gong, Yingying Li, Ying Zhang, Zhangning Fu, Quan Hong, Guangyan  
Cai, Xiangmei Chen, and Xuefeng Sun**

**Table S1. Sequences of siRNAs used, related to STRA Methods.**

|       | <b>Target gene</b> | <b>Species</b> |         | <b>Sequence (5'-3')</b> |
|-------|--------------------|----------------|---------|-------------------------|
| siRNA | G6PD               | Human          | Forward | GUCGUCCUCUAUGUGGAGAAU   |
|       |                    |                | Reverse | AUUCUCCACAUAGAGGACGAC   |

**Table S2. Primer sequences used for qRT-PCR analyses, related to STRA Methods.**

| <b>Primer (Human)</b> |         | <b>Sequence (5'-3')</b> |
|-----------------------|---------|-------------------------|
| G6PD                  | Forward | CGAGGCCGTCACCAAGAAC     |
|                       | Reverse | GTAGTGGTCGATGCGGTAGA    |
| $\beta$ -actin        | Forward | CTCCATCCTGGCCTCGCTGT    |
|                       | Reverse | GCTGTCACCTTCACCGTTCC    |

**Table S3. Metabolism Product change in Kidney of UNX VS Control, related to Figure 8A.**

| <b>Super Meta Pathway</b> | <b>Metabolism Product</b>         | <b>Sub Meta Pathway</b>                          | <b>Mean ratio</b> | <b>Up/Down Regulation</b> | <b>Raw P value</b> |
|---------------------------|-----------------------------------|--------------------------------------------------|-------------------|---------------------------|--------------------|
|                           | creatinine                        | Creatine Metabolism                              | 2.515             | ↑                         | 0.01218578         |
|                           | sarcosine                         | Glycine, Serine and Threonine Metabolism         | 1.831             | ↑                         | 0.01218578         |
|                           | ethylmalonate                     | Leucine, Isoleucine and Valine Metabolism        | 2.06              | ↑                         | 0.02157175         |
|                           | N,N,N-trimethyl-5-aminovalerate   | Lysine Metabolism                                | 2.678             | ↑                         | 0.01218578         |
|                           | N2-acetyllysine                   |                                                  | 1.509             | ↑                         | 0.03671386         |
| Amino Acid                | S-adenosylmethionine (SAM)        | Methionine, Cysteine, SAM and Taurine Metabolism | 1.879             | ↑                         | 0.01218578         |
|                           | 5-methylthioadenosine (MTA)       | Polyamine Metabolism                             | 1.748             | ↑                         | 0.02157175         |
|                           | 3-indoxyl sulfate                 |                                                  | 9.158             | ↑                         | 0.01218578         |
|                           | kynurenate                        | Tryptophan Metabolism                            | 2.351             | ↑                         | 0.01218578         |
|                           | xanthurenate                      |                                                  | 4.532             | ↑                         | 0.02157175         |
|                           | N2,N5-diacetylornithine           | Urea cycle; Arginine and Proline Metabolism      | 1.499             | ↑                         | 0.01218578         |
|                           | N-acetylcitrulline                |                                                  | 2.486             | ↑                         | 0.01218578         |
| Lipid                     | ceramide (d18:1/14:0, d16:1/16:0) | Ceramides                                        | 0.46              | ↓                         | 0.02157175         |
|                           | 3-hydroxypalmitoylcarnitine       | Fatty Acid Metabolism (Acyl Carnitine, Hydroxy)  | 1.758             | ↑                         | 0.02157175         |
|                           | 2-hydroxystearate                 | Fatty Acid, Monohydroxy                          | 0.61              | ↓                         | 0.01218578         |

|                        |                           |                                                                                                             |       |   |            |
|------------------------|---------------------------|-------------------------------------------------------------------------------------------------------------|-------|---|------------|
|                        | 3-hydroxysebacate         |                                                                                                             | 1.914 | ↑ | 0.02157175 |
|                        | (3'-5')-guanylylcytidine  | Dinucleotide                                                                                                | 1.623 | ↑ | 0.03671386 |
| Nucleotide             | allantoin                 | Purine Metabolism, (Hypo)Xanthine/Inosine containing (Purine Metabolism, (Hypo)Xanthine/Inosine containing) | 2.336 | ↑ | 0.01218578 |
| Peptide                | phenylacetyl glycine      | Acetylated Peptides                                                                                         | 2.657 | ↑ | 0.01218578 |
| Cofactors and Vitamins | ascorbic acid 3-sulfate   | Ascorbate and Aldarate Metabolism                                                                           | 2.152 | ↑ | 0.01218578 |
|                        | 4-ethylphenylsulfate      |                                                                                                             | 6.055 | ↑ | 0.01218578 |
|                        | catechol sulfate          | Benzoate Metabolism                                                                                         | 2.516 | ↑ | 0.01218578 |
|                        | guaiacol sulfate          |                                                                                                             | 3.767 | ↑ | 0.01218578 |
| Xenobiotics            | hippurate                 |                                                                                                             | 2.065 | ↑ | 0.01218578 |
|                        | 2,6-dihydroxybenzoic acid | Drug - Topical Agents                                                                                       | 2.897 | ↑ | 0.01218578 |
|                        | 3-indoleglyoxylic acid    |                                                                                                             | 2.118 | ↑ | 0.01115943 |
|                        | vanillic acid glycine     | Food Component/Plant                                                                                        | 5.884 | ↑ | 0.01115943 |

UNX: unilateral nephrectomy. Compared with control group, ↑ indicate that the relative content of the metabolite in UNX group is up-regulated, ↓ indicate that the relative content of the metabolite in UNX group is down-regulated.

**Table S4. Metabolism Product change in Kidney of 1/6NX VS Control, related related to Figure 8B.**

| <b>Super Meta Pathway</b> | <b>Metabolism Product</b> | <b>Sub Meta Pathway</b>                              | <b>Mean ratio</b>                           | <b>Up/Down Regulation</b> | <b>Raw P value</b> |            |
|---------------------------|---------------------------|------------------------------------------------------|---------------------------------------------|---------------------------|--------------------|------------|
| Amino Acid                | betaine aldehyde          | Glycine, Serine and Threonine Metabolism             | 0.324                                       | ↓                         | 0.01218578         |            |
|                           | N-acetylserine            |                                                      | 0.55                                        | ↓                         | 0.01218578         |            |
|                           | 2-oxoarginine             |                                                      | Urea cycle; Arginine and Proline Metabolism | 0.402                     | ↓                  | 0.02157175 |
|                           | ornithine                 | 1.319                                                |                                             | ↑                         | 0.01218578         |            |
|                           |                           | N-acetylvaline                                       | Leucine, Isoleucine and Valine Metabolism   | 0.582                     | ↓                  | 0.01218578 |
|                           |                           | N-acetyltyrosine                                     | Tyrosine Metabolism                         | 0.506                     | ↓                  | 0.01218578 |
| Carbohydrate              | galactose 1-phosphate     | Fructose, Mannose and Galactose Metabolism           | 2.221                                       | ↑                         | 0.01218578         |            |
|                           | galactose 6-phosphate     |                                                      | 2.652                                       | ↑                         | 0.01218578         |            |
|                           | 3-phosphoglycerate        | Glycolysis, Gluconeogenesis, and Pyruvate Metabolism | 2.367                                       | ↑                         | 0.01218578         |            |
|                           | glucose                   |                                                      | 0.614                                       | ↓                         | 0.01218578         |            |
|                           | 3-phosphoglycerate        |                                                      | 1.55                                        | ↑                         | 0.01218578         |            |
|                           |                           | phosphoenolpyruvate (PEP)                            |                                             | 2.097                     | ↑                  | 0.01218578 |
|                           |                           | 6-phosphogluconate                                   | Pentose Phosphate Pathway                   | 2.24                      | ↑                  | 0.01218578 |
|                           |                           | glucuronate 1-phosphate                              | Nucleotide Sugar                            | 5.591                     | ↑                  | 0.01218578 |
|                           |                           | N-acetylglucosamine                                  | Aminosugar Metabolism                       | 3.743                     | ↑                  | 0.02157175 |
|                           | 6-phosphate               |                                                      |                                             |                           |                    |            |
| Lipid                     | 1-oleoyl-GPE (18:1)       | Lysophospholipid                                     | 0.646                                       | ↓                         | 0.01218578         |            |
|                           | 1-palmitoyl-GPE (16:0)    |                                                      | 0.673                                       | ↓                         | 0.01218578         |            |
|                           | 1-palmitoyl-GPI (16:0)    |                                                      | 0.659                                       | ↓                         | 0.01218578         |            |
|                           | 1-stearoyl-GPE (18:0)     |                                                      | 0.693                                       | ↓                         | 0.01218578         |            |

|            |                                       |                                                      |       |   |            |
|------------|---------------------------------------|------------------------------------------------------|-------|---|------------|
|            | phosphoethanolamine                   | Phospholipid Metabolism                              | 1.532 | ↑ | 0.01218578 |
|            | 2-hydroxylignocerate                  | Fatty Acid, Monohydroxy                              | 1.973 | ↑ | 0.01218578 |
| Nucleotide | 2'-deoxyinosine                       | Purine Metabolism, (Hypo)Xanthine/Inosine containing | 0.167 | ↓ | 0.01218578 |
|            | 2'-deoxyguanosine                     | Purine Metabolism, Guanine containing                | 0.139 | ↓ | 0.01218578 |
|            | 2'-O-methyluridine                    | Pyrimidine Metabolism, Cytidine containing           | 0.475 | ↓ | 0.02157175 |
|            | thymidine                             | Pyrimidine Metabolism, Thymine containing            | 0.185 | ↓ | 0.01218578 |
|            | uracil                                | Pyrimidine Metabolism, Uracil containing             | 0.761 | ↓ | 0.01218578 |
|            | 2'-deoxyadenosine<br>5'-monophosphate | Purine Metabolism, Adenine containing                | 0.172 | ↓ | 0.01218578 |
| Peptide    | tyrosylglycine                        | Dipeptide                                            | 5.033 | ↑ | 0.01218578 |
|            | phenylalanylglycine                   |                                                      | 3.944 | ↑ | 0.01218578 |

1/6NX: 1/6 nephrectomy. Compared with control group, ↑ indicate that the relative content of the metabolite in UNX group is up-regulated, ↓ indicate that the relative content of the metabolite in UNX group is down-regulated.

**Table S5. Metabolism Product change in Kidney of UUO VS Control, related related to Figure 8C.**

| Super Meta Pathway | Metabolism Product                | Sub Meta Pathway                                     | Mean ratio | Up/Down Regulation | Raw P value |
|--------------------|-----------------------------------|------------------------------------------------------|------------|--------------------|-------------|
| Amino Acid         | betaine aldehyde                  | Glycine, Serine and Threonine Metabolism             | 0.365      | ↓                  | 0.01218578  |
|                    | N,N,N-trimethyl-5-aminovalerate   | Lysine Metabolism                                    | 3.406      | ↑                  | 0.01218578  |
|                    | N-acetylphenylalanine             | Phenylalanine Metabolism                             | 0.306      | ↓                  | 0.01218578  |
|                    | (N(1) + N(8))-acetylspermidine    | Polyamine Metabolism                                 | 1.899      | ↑                  | 0.01218578  |
|                    | spermidine                        |                                                      | 1.899      | ↑                  | 0.01218578  |
|                    | oxindolylalanine                  | Tryptophan Metabolism                                | 0.322      | ↓                  | 0.01218578  |
|                    | homoarginine                      | Urea cycle; Arginine and Proline Metabolism          | 0.328      | ↓                  | 0.007494958 |
| Carbohydrate       | 3-phosphoglycerate                | Glycolysis, Gluconeogenesis, and Pyruvate Metabolism | 2.409      | ↑                  | 0.01218578  |
|                    | glycerate                         |                                                      | 0.445      | ↓                  | 0.01218578  |
|                    | glucuronate 1-phosphate           | Nucleotide Sugar                                     | 6.811      | ↑                  | 0.01218578  |
|                    | 6-phosphogluconate                | Pentose Phosphate Pathway                            | 4.11       | ↑                  | 0.01218578  |
|                    | sedoheptulose-7-phosphate         |                                                      | 2.505      | ↑                  | 0.01218578  |
| Lipid              | ceramide (d18:1/14:0, d16:1/16:0) | Ceramides                                            | 0.197      | ↓                  | 0.009700785 |
|                    | N-palmitoylglycine                | Fatty Acid Metabolism (Acyl Glycine)                 | 0.23       | ↓                  | 0.01218578  |
|                    | 2-aminooctanoate                  | Fatty Acid, Amino                                    | 0.461      | ↓                  | 0.009700785 |
|                    | glycerol                          | Glycerolipid Metabolism                              | 0.491      | ↓                  | 0.01218578  |
| Nucleotide         | (3'-5')-adenylyluridine           | Dinucleotide                                         | 5.389      | ↑                  | 0.01218578  |
|                    | (3'-5')-uridylyluridine           |                                                      | 4.704      | ↑                  | 0.01218578  |
|                    | xanthosine                        | Purine Metabolism,                                   | 0.532      | ↓                  | 0.01218578  |



|                        |                                                |                                            |        |   |             |
|------------------------|------------------------------------------------|--------------------------------------------|--------|---|-------------|
|                        |                                                | (Hypo)Xanthine/Inosine containing          |        |   |             |
|                        | 2'-deoxyadenosine 5'-monophosphate             |                                            | 0.145  | ↓ | 0.01218578  |
|                        | 2'-AMP                                         | Purine Metabolism, Adenine containing      | 7.348  | ↑ | 0.01218578  |
|                        | adenosine 3',5'-diphosphate                    |                                            | 2.891  | ↑ | 0.01218578  |
|                        | cytidine 2' or 3'-monophosphate (2' or 3'-CMP) | Pyrimidine Metabolism, Cytidine containing | 2.411  | ↑ | 0.009700785 |
|                        | 2'-O-methyluridine                             |                                            | 0.412  | ↓ | 0.01115943  |
|                        | uridine 2'-monophosphate (2'-UMP)              | Pyrimidine Metabolism, Uracil containing   | 4.587  | ↑ | 0.01115943  |
| Cofactors and Vitamins | protoporphyrin IX                              | Hemoglobin and Porphyrin Metabolism        | 7.13   | ↑ | 0.01218578  |
| Xenobiotics            | daidzein sulfate (2)                           |                                            | 10.106 | ↑ | 0.007494958 |
|                        | vanillic acid glycine                          | Food Component/Plant                       | 17.761 | ↑ | 0.01115943  |

UUO: unilateral ureteral obstruction. Compared with control group, ↑ indicate that the relative content of the metabolite in UNX group is up-regulated, ↓ indicate that the relative content of the metabolite in UNX group is down-regulated.
